# Supplementary material
Source: HighWire-hosted journal article supplement (https://erj.ersjournals.com/content/54/3/1901610)
Supplement: inline-supplementary-material-1 [file inline-supplementary-material-1.pdf]

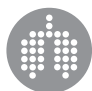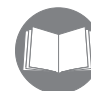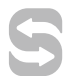

SHAREABLE PDF

# Respiratory physiotherapy in the bronchiectasis guidelines: is there a loud voice we are yet to hear?

Arietta Spinou <sup>1</sup> and James D. Chalmers<sup>2</sup>

**Affiliations:** <sup>1</sup>Population Health Sciences, Life Sciences and Medicine, King's College London, London, UK.  
<sup>2</sup>School of Medicine, University of Dundee, Dundee, UK.

**Correspondence:** Arietta Spinou, Dept of Population Health Sciences, School of Population Health and Environmental Sciences, 2nd floor, Addison House, Guy's Campus, King's College London, London, SE1 1UL, UK. E-mail: arietta.spinou@kcl.ac.uk

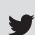

@ERSpublications

**A call for action for great awareness and research into airway clearance techniques and pulmonary rehabilitation in bronchiectasis** <http://bit.ly/2L8F4Va>

**Cite this article as:** Spinou A, Chalmers JD. Respiratory physiotherapy in the bronchiectasis guidelines: is there a loud voice we are yet to hear? *Eur Respir J* 2019; 54: 1901610 [<https://doi.org/10.1183/13993003.01610-2019>].

This single-page version can be shared freely online.

Bronchiectasis is a chronic respiratory disease of airway dilatation, where patients typically suffer from respiratory infections, fatigue, sputum, cough, dyspnoea and poor quality of life [1, 2]. This condition has received increased interest over the past years, with important developments in establishing national and international patient registries [3–5], randomised controlled trials of new treatments [6–8] and disease-specific health status questionnaires, such as the Bronchiectasis Health Questionnaire and the Quality of Life Questionnaire – Bronchiectasis [9, 10]. A number of new treatment approaches have been proposed including long term antibiotic therapies and immune modulating drugs [6, 7, 11, 12].
